# Supplementary material for: Super-resolution microscopy reveals majorly mono- and dimeric presenilin1/γ-secretase at the cell surface
Source: eLife journal article supplement (doi:10.7554/elife.56679), 2020-06-30
Supplement: fig3-data1 [file Figure3-Source Data1.docx]

**Source Data for Hotspot analysis (Figure 3)**

This .zip folder contains all SPT data used for quantification of hotspots related to Figure 3-L.

Folder names go accordingly to the treatment applied to the cells. The cell line used for this experiment was TKO NCT-SNAP GFP-PSEN1 FACSorted for high levels of both tags as shown in Supplementary Figure1. Each folder contains subfolders “DBSCAN hotspots” folder provides output images of clusters found per cell from localizations; “Tracks” folder contains SPT output of tracks as analyzed by Metamorph PALMtracer, which were overlaied on to the DBSCAN hotspot data to found how many tracks have each hotspot.
