# Supplementary material for: Super-resolution microscopy reveals majorly mono- and dimeric presenilin1/γ-secretase at the cell surface
Source: eLife journal article supplement (doi:10.7554/elife.56679), 2020-06-30
Supplement: fig3-data2 [file Figure3_Source Data 2_SPT.xlsx]

## Sheet: D
DMSO	DAPT	InhX
0.1995	0.1793	0.2028
0.2006	0.2163	0.2201
0.1891	0.171	0.1572
0.2008	0.2073	0.1919
0.135	0.1349	0.1717
0.1001	0.1114	0.1295
0.198	0.1339	0.1049
0.1212	0.1395	0.1394
0.09022	0.1147	0.1583
0.1612	0.1433	0.1689
0.1309	0.1565	0.1071
0.2218	0.08296	0.1078
0.1384	0.1488	0.1161
0.1217	0.1356	0.1893

## Sheet: D_DMSO
Number of values	936	3705	2568	2150	1708	8169	4686	2224	2445	4700	2596	1709	6770	3961
Minimum	0.000225	0.000105	0.000143	0.000102	0.000102	0.000101	0.000107	0.000112	0.0001	0.000106	0.000129	0.000141	0.000106	0.000105
25% Percentile	0.05295	0.07566	0.0688	0.06903	0.02606	0.02647	0.0843	0.02413	0.01741	0.05939	0.04804	0.1004	0.04547	0.03317
Median	0.161	0.1674	0.1595	0.1641	0.09625	0.07475	0.168	0.08891	0.06705	0.1329	0.1079	0.1904	0.1094	0.09616
75% Percentile	0.2966	0.29	0.2702	0.2869	0.1993	0.1418	0.2783	0.1815	0.1321	0.2271	0.1832	0.3118	0.1981	0.1754
Maximum	1.138	1.175	1.094	1.152	0.9716	0.7955	1.111	1.016	0.8532	1.195	1.044	1.034	1.052	0.952
Mean	0.1995	0.2006	0.1891	0.2008	0.135	0.1001	0.198	0.1212	0.09022	0.1612	0.1309	0.2218	0.1384	0.1217
Std. Deviation	0.1829	0.1604	0.1572	0.1738	0.1375	0.09766	0.1562	0.1223	0.0927	0.1388	0.1135	0.164	0.1246	0.115
Std. Error of Mean	0.005978	0.002635	0.003102	0.003749	0.003327	0.001081	0.002281	0.002593	0.001875	0.002024	0.002227	0.003967	0.001514	0.001828
Lower 95% CI of mean	0.1878	0.1954	0.183	0.1935	0.1285	0.098	0.1935	0.1161	0.08655	0.1572	0.1265	0.2141	0.1355	0.1181
Upper 95% CI of mean	0.2113	0.2058	0.1952	0.2082	0.1416	0.1022	0.2025	0.1263	0.0939	0.1652	0.1352	0.2296	0.1414	0.1253
Sum	186.8	743.2	485.6	431.8	230.7	817.9	927.8	269.6	220.6	757.7	339.8	379.1	937.1	482

## Sheet: D_DAPT
Number of values	1946	2986	1924	921	1930	2176	2296	1375	2477	1807	3287	984	3081	1162
Minimum	0.000104	0.000105	0.000115	0.000124	0.000111	0.000104	0.000101	0.000123	0.000123	0.00014	0.000109	0.000105	0.0001	0.00012
25% Percentile	0.0372	0.09523	0.05707	0.07374	0.04732	0.02456	0.03323	0.0444	0.0148	0.0445	0.04544	0.01097	0.04942	0.05155
Median	0.1393	0.1895	0.1441	0.1706	0.1114	0.08532	0.09884	0.1175	0.08238	0.1198	0.1266	0.05715	0.1246	0.1122
75% Percentile	0.2617	0.3021	0.2482	0.2914	0.1898	0.1654	0.1915	0.2	0.1795	0.2076	0.2219	0.1212	0.2138	0.1912
Maximum	1.26	1.208	0.8009	1.231	0.7452	0.85	1.01	1.099	0.8476	0.911	1.326	0.5673	1.245	0.7435
Mean	0.1793	0.2163	0.171	0.2073	0.1349	0.1114	0.1339	0.1395	0.1147	0.1433	0.1565	0.08296	0.1488	0.1356
Std. Deviation	0.1727	0.1633	0.1437	0.1807	0.1182	0.108	0.1334	0.1242	0.1183	0.1261	0.1466	0.09202	0.1312	0.1144
Std. Error of Mean	0.003915	0.002988	0.003276	0.005955	0.00269	0.002316	0.002784	0.003348	0.002376	0.002965	0.002557	0.002934	0.002363	0.003355
Lower 95% CI of mean	0.1716	0.2104	0.1646	0.1956	0.1296	0.1068	0.1284	0.133	0.11	0.1374	0.1515	0.0772	0.1441	0.129
Upper 95% CI of mean	0.187	0.2222	0.1774	0.219	0.1401	0.1159	0.1394	0.1461	0.1193	0.1491	0.1616	0.08871	0.1534	0.1422
Sum	348.9	645.9	329	190.9	260.3	242.4	307.4	191.8	284.1	258.9	514.6	81.63	458.3	157.6

## Sheet: D_InhX
Number of values	2147	2762	2704	2122	2420	1597	2135	2427	2375	1995	1497	2828	3372	2006
Minimum	0.000107	0.000105	0.000102	0.000152	0.000114	0.000123	0.000111	0.000129	0.000126	0.000114	0.000132	0.000106	0.000102	0.000144
25% Percentile	0.08048	0.08764	0.05684	0.07654	0.06971	0.03684	0.02119	0.03946	0.05769	0.05158	0.02676	0.02585	0.02709	0.06345
Median	0.1727	0.1844	0.1322	0.1625	0.1405	0.1062	0.07874	0.109	0.1337	0.1405	0.07679	0.08192	0.0937	0.1577
75% Percentile	0.2866	0.308	0.2259	0.2709	0.2379	0.1838	0.1539	0.2035	0.2243	0.2428	0.1542	0.1533	0.1712	0.2649
Maximum	1.456	1.121	1.046	1.302	1.074	0.8699	0.7467	1.181	0.9611	1.169	1.012	0.9311	1.123	1.344
Mean	0.2028	0.2201	0.1572	0.1919	0.1717	0.1295	0.1049	0.1394	0.1583	0.1689	0.1071	0.1078	0.1161	0.1893
Std. Deviation	0.1686	0.1762	0.1328	0.1537	0.1387	0.1183	0.1045	0.1297	0.1323	0.1508	0.1107	0.1069	0.1099	0.1624
Std. Error of Mean	0.003639	0.003354	0.002554	0.003336	0.00282	0.002959	0.002263	0.002632	0.002714	0.003376	0.002861	0.002009	0.001892	0.003626
Lower 95% CI of mean	0.1957	0.2135	0.1522	0.1854	0.1661	0.1237	0.1005	0.1342	0.1529	0.1623	0.1015	0.1039	0.1124	0.1822
Upper 95% CI of mean	0.21	0.2266	0.1622	0.1985	0.1772	0.1353	0.1094	0.1445	0.1636	0.1756	0.1128	0.1118	0.1198	0.1964
Sum	435.5	607.8	425.1	407.3	415.4	206.8	224	338.2	375.9	337	160.4	304.9	391.6	379.7

## Sheet: LogD
	DMSO			DAPT			InhX
-4	0.0469897	0.0544832	14	0.0813281	0.0371382	14	0.0628607	0.0630001	14
	0.194174	0.126698	14	0.287938	0.117906	14	0.228542	0.122187	14
	0.350425	0.221319	14	0.464969	0.242118	14	0.324266	0.157833	14
	0.627423	0.365687	14	0.647021	0.392148	14	0.559028	0.208592	14
	0.720578	0.369389	14	0.931414	0.417615	14	0.823633	0.379742	14
-3	1.03921	0.556476	14	1.26366	0.547274	14	1.02683	0.457836	14
	1.47856	0.744401	14	1.87175	0.748009	14	1.60345	0.863761	14
	1.83738	0.875028	14	2.33051	0.76581	14	1.87828	0.632079	14
	2.01117	0.711332	14	2.61276	0.854812	14	2.06091	0.635856	14
	2.18877	0.757528	14	2.29345	0.868634	14	2.05568	0.794764	14
-2	2.3759	0.815774	14	2.51493	0.673901	14	2.29644	0.83882	14
	3.12543	0.94238	14	3.35436	1.04629	14	2.93841	0.975872	14
	4.00155	1.56058	14	3.80751	1.17831	14	4.12125	1.30624	14
	6.28254	1.97825	14	5.67411	1.31128	14	6.12489	1.61117	14
	9.94222	2.73697	14	9.72521	2.07766	14	9.73771	2.2067	14
-1	14.9068	2.80162	14	15.0305	2.31589	14	15.0837	1.9561	14
	18.7327	2.17784	14	19.1779	2.63388	14	19.4608	1.59645	14
	17.0944	4.77721	14	16.8884	4.37785	14	17.7046	4.57979	14
	9.76335	5.16136	14	8.42207	4.04503	14	9.01425	4.25608	14
	2.89783	2.05752	14	2.34306	1.77325	14	2.59584	1.9252	14
0	0.382563	0.351764	14	0.271368	0.359618	14	0.278449	0.246565	14
	0	0	14	0.0058436	0.0154127	14	0.0202344	0.0509026	14

## Sheet: MSD
	DMSO			DAPT			InhX
(t)	mean	SD	N	mean	SD	N	mean	SD	N
0.05	0.0293243	0.00680447	14	0.0270252	0.00495235	14	0.0286186	0.00614301	14
0.1	0.0593614	0.0153037	14	0.0548296	0.0120846	14	0.0581387	0.0140217	14
0.15	0.0885684	0.0238509	14	0.0819059	0.0193871	14	0.0868411	0.021771	14
0.2	0.117357	0.0324656	14	0.108569	0.02684	14	0.115029	0.0294204	14
0.25	0.145898	0.0411563	14	0.135192	0.0342784	14	0.142827	0.0369035	14
0.3	0.174283	0.0497893	14	0.161745	0.0419902	14	0.170788	0.044795	14
0.35	0.202755	0.0582844	14	0.188286	0.0495048	14	0.198918	0.0529949	14
0.4	0.231436	0.0671194	14	0.214761	0.0571096	14	0.226915	0.0608326	14
0.45	0.260055	0.0756942	14	0.241344	0.0645307	14	0.255088	0.0685569	14
0.5	0.284812	0.0833776	14	0.264638	0.0728324	14	0.279523	0.0756685	14
0.55	0.308585	0.0914412	14	0.287949	0.0791513	14	0.304393	0.0817	14
0.6	0.334231	0.101116	14	0.309377	0.0848104	14	0.329882	0.0904313	14
0.65	0.355609	0.105479	14	0.329831	0.0900334	14	0.354492	0.0988166	14
0.7	0.377814	0.112791	14	0.353686	0.099904	14	0.379322	0.106518	14
0.75	0.399882	0.119096	14	0.377909	0.108352	14	0.400496	0.113088	14
0.8	0.418045	0.124091	14	0.397815	0.120499	14	0.424022	0.123358	14
0.85	0.431734	0.129024	14	0.415992	0.133472	14	0.448987	0.136518	14
0.9	0.448795	0.133932	14	0.436461	0.137923	14	0.470359	0.13956	14
0.95	0.466156	0.139661	14	0.458309	0.142575	14	0.487239	0.143658	14
1	0.484874	0.154318	14	0.47382	0.150713	14	0.511977	0.155679	14
1.05	0.497559	0.164448	14	0.489814	0.155323	14	0.526835	0.157274	14
1.1	0.512919	0.172865	14	0.509334	0.170646	14	0.54145	0.159082	14
1.15	0.525364	0.185851	14	0.521356	0.171314	14	0.557701	0.176811	14
1.2	0.523105	0.183864	14	0.534599	0.183807	14	0.570021	0.182799	14
1.25	0.535012	0.182874	14	0.552393	0.193351	14	0.586232	0.19392	14
1.3	0.548197	0.194183	14	0.562842	0.200714	14	0.60579	0.196863	14
1.35	0.561453	0.222002	14	0.579738	0.213743	14	0.630165	0.210547	14
1.4	0.566732	0.236007	14	0.58938	0.218723	14	0.645637	0.216468	14
1.45	0.578644	0.24904	14	0.605503	0.234372	14	0.652138	0.212473	14
1.5	0.596511	0.261589	14	0.609841	0.25277	14	0.6421	0.206665	14
1.55	0.608925	0.275181	14	0.608829	0.242905	14	0.637741	0.209127	14
1.6	0.624043	0.281686	14	0.606582	0.250148	14	0.641125	0.242853	14
1.65	0.626324	0.299214	14	0.591934	0.26027	14	0.661694	0.273383	14
1.7	0.635872	0.30328	14	0.596688	0.272962	14	0.657807	0.228395	14
1.75	0.639558	0.310836	14	0.597699	0.27176	14	0.677315	0.239261	14
1.8	0.638243	0.264906	14	0.605312	0.309487	14	0.674456	0.233987	14
1.85	0.651627	0.293281	14	0.582023	0.322031	14	0.665353	0.217398	14
1.9	0.634124	0.289515	14	0.611672	0.335365	14	0.634107	0.190892	14
1.95	0.630387	0.273629	14	0.618823	0.365608	14	0.611127	0.192531	14
2	0.615244	0.305779	14	0.578413	0.308738	14	0.613098	0.21551	14
2.05	0.585699	0.308667	14	0.590264	0.328728	14	0.633901	0.243329	14
2.1	0.586901	0.313279	14	0.572407	0.34778	14	0.584036	0.227984	14
2.15	0.578624	0.348681	14	0.542785	0.303684	14	0.572288	0.224663	14
2.2	0.550103	0.354601	14	0.539926	0.305656	14	0.58134	0.232072	14
2.25	0.481007	0.340492	14	0.5386	0.333022	14	0.531128	0.27168	14
2.3	0.502129	0.350417	14	0.477444	0.31587	14	0.545929	0.302838	14
2.35	0.4874	0.349177	14	0.536386	0.380994	14	0.522958	0.323023	14
2.4	0.478015	0.378848	14	0.478366	0.408542	14	0.511233	0.44164	14
2.45	0.459536	0.424469	14	0.379377	0.40234	14	0.465875	0.372324	14

## Sheet: EdgeVSInside
	Edges												Inside
DMSO	6.78788	14	13.4286	14.7	4.9361	15.35	15.4146	3.23365	15.8571	29.8462	12	5.57407	10.5	10.2048	9.81481	10.8182	5.205	10.2625	3.04964	2.61111	6.36842	11.6897	6.28302	3.87387
DAPT	22.9737	5.32	5.98667	3.66154	6.14583	7.84677							8.75	6.83636	5.52239	3.14516	3.90511	5.9375
InhX	11.8461	15.5172	10.2	13.6842	32.8571	4.4086	3.62162	6.98718	6.68889	5.63917	5.74638		19.6471	12.5	7.8	10.087	8.03704	4.95122	6.35443	4.76471	3.74193	4.70455	4.08485

## Sheet: Dedge_DMSO
Number of values	257	495	808	157	1858	1635	673	453	472	802	1001	710
Minimum	0.000225	0.00016	0.000133	0.000435	0.000127	0.000107	0.000112	0.000187	0.001105	0.000141	0.000334	0.000127
25% Percentile	0.0523	0.0649	0.1052	0.1009	0.02214	0.09346	0.07658	0.01644	0.06372	0.1264	0.06406	0.03796
Median	0.1597	0.1547	0.2249	0.1995	0.06377	0.187	0.1566	0.07236	0.1261	0.2218	0.1426	0.1157
75% Percentile	0.2988	0.273	0.3559	0.3184	0.1331	0.306	0.2481	0.1412	0.2303	0.3458	0.2426	0.2054
Maximum	1.097	0.8658	1.12	0.8985	0.7955	1.111	1.016	0.8532	1.195	1.034	1.052	0.952
Mean	0.1992	0.1898	0.254	0.2253	0.09391	0.2199	0.1825	0.09837	0.1675	0.2512	0.1723	0.14
Std. Deviation	0.1858	0.1535	0.1922	0.1657	0.09589	0.1704	0.1423	0.1085	0.1541	0.1686	0.1443	0.1304
Std. Error of Mean	0.01159	0.006899	0.006761	0.01323	0.002225	0.004214	0.005484	0.005098	0.007092	0.005953	0.004561	0.004893
Lower 95% CI of mean	0.1764	0.1762	0.2407	0.1992	0.08954	0.2116	0.1717	0.08835	0.1535	0.2396	0.1633	0.1304
Upper 95% CI of mean	0.222	0.2033	0.2673	0.2514	0.09827	0.2281	0.1932	0.1084	0.1814	0.2629	0.1812	0.1496
Sum	51.19	93.93	205.2	35.37	174.5	359.5	122.8	44.56	79.05	201.5	172.4	99.4

## Sheet: Dedge_DAPT
Number of values	911	632	524	303	1372	1097
Minimum	0.000283	0.000127	0.000101	0.000157	0.000109	0.000117
25% Percentile	0.1207	0.04237	0.04717	0.02086	0.04627	0.05678
Median	0.2124	0.1166	0.1298	0.09717	0.1322	0.1408
75% Percentile	0.3305	0.2038	0.2544	0.1907	0.2292	0.2345
Maximum	1.208	0.7431	0.9693	0.6571	1.326	1.245
Mean	0.2471	0.1397	0.1696	0.1256	0.1614	0.1649
Std. Deviation	0.1815	0.1236	0.1556	0.1221	0.1497	0.1411
Std. Error of Mean	0.006014	0.004918	0.006796	0.007013	0.004041	0.004261
Lower 95% CI of mean	0.2353	0.1301	0.1563	0.1118	0.1534	0.1566
Upper 95% CI of mean	0.2589	0.1494	0.183	0.1394	0.1693	0.1733
Sum	225.1	88.32	88.87	38.06	221.4	180.9

## Sheet: Dedge_InhX
Number of values	501	479	784	279	474	503	513	623	346	644	931
Minimum	0.000168	0.000105	0.000121	0.000257	0.001567	0.000257	0.000111	0.000123	0.000132	0.00013	0.000148
25% Percentile	0.0918	0.1149	0.07265	0.08634	0.08905	0.03029	0.01731	0.06322	0.04627	0.03266	0.03721
Median	0.1867	0.2067	0.1428	0.1789	0.1738	0.09614	0.07281	0.169	0.1164	0.08734	0.1092
75% Percentile	0.3001	0.3286	0.2378	0.2987	0.2726	0.1668	0.1524	0.2854	0.1969	0.1594	0.1896
Maximum	1.217	0.9432	0.9736	1.302	1.074	0.8699	0.6882	1.072	1.012	0.9093	1.123
Mean	0.2138	0.2411	0.1671	0.218	0.2028	0.1185	0.1025	0.1992	0.1456	0.1155	0.1326
Std. Deviation	0.1719	0.1745	0.1309	0.1895	0.1533	0.1129	0.1063	0.1735	0.1427	0.112	0.1211
Std. Error of Mean	0.007681	0.007972	0.004675	0.01134	0.007042	0.005032	0.004692	0.006952	0.007672	0.004413	0.00397
Lower 95% CI of mean	0.1987	0.2254	0.1579	0.1957	0.189	0.1086	0.09331	0.1855	0.1306	0.1069	0.1248
Upper 95% CI of mean	0.2289	0.2568	0.1763	0.2403	0.2166	0.1284	0.1117	0.2128	0.1607	0.1242	0.1404
Sum	107.1	115.5	131	60.82	96.12	59.6	52.6	124.1	50.39	74.4	123.5

[truncated: 7 more sheets: Dinside_DMSO, Dinside_DAPT, Dinside_InhX, Alpha, Alpha_DMSO, Alpha_DAPT, Alpha_InhX]
